# Supplementary material for: Hypoxia-induced lactate dehydrogenase A protects cells from apoptosis in endometriosis
Source: PubMed Central journal article supplement — Mol Med Rep. 2021 Jul 6;24(3):637. doi: 10.3892/mmr.2021.12276 (PMC8281285; doi:10.3892/mmr.2021.12276), 2021-07-06
Supplement: Supplementary_Data.pdf [file Supplementary_Data.pdf]

Figure S1. Immunofluorescence assay of primary cultured endometrial stromal cells showed positive staining for the stromal marker, vimentin (green), and negative staining for the epithelial marker, pan-cytokeratin (red). DAPI (blue) was used to stain nuclei. Magnification, x400.

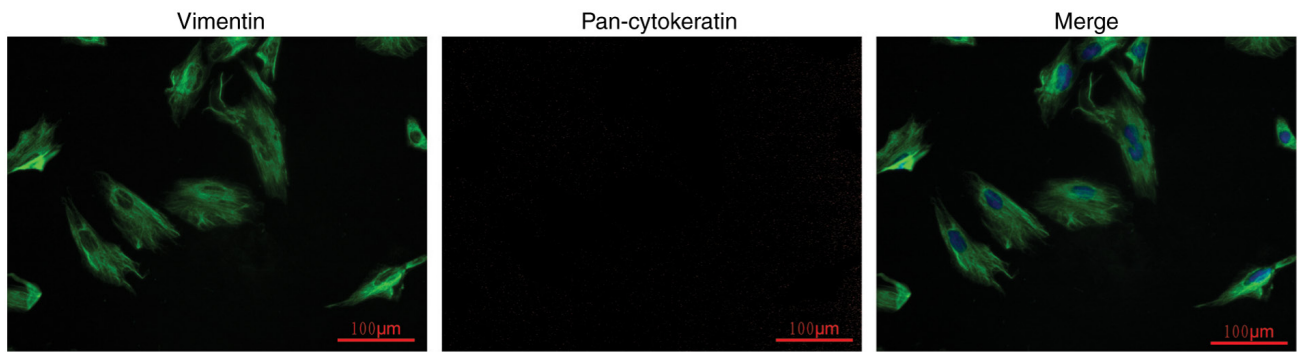

Figure S2. Hypoxia-induced LDHA mRNA expression in endometrial cells. Reverse transcription-quantitative PCR assay of HIF-1 $\alpha$  and LDHA mRNA expression in (A) NESCs, (B) EuESCs, (C) EcESCs and (D) Ishikawa cells under normoxia or hypoxia (NESCs, EuESCs and EcESCs; 10 cases for each cell type). 18S was used as an internal control. Values are expressed as mean  $\pm$  SD of three independent experiments. One-way ANOVA and Bonferroni post hoc test were used to analyze multiple comparisons. \* $P$ <0.05, \*\* $P$ <0.01 and \*\*\* $P$ <0.001 vs. 0 h. LDHA, lactate dehydrogenase A; HIF-1 $\alpha$ , hypoxia-inducible factor 1 $\alpha$ ; NESCs, normal endometrial stromal cells; EuESCs, eutopic endometrial stromal cells; EcESCs, ectopic endometrial stromal cells.

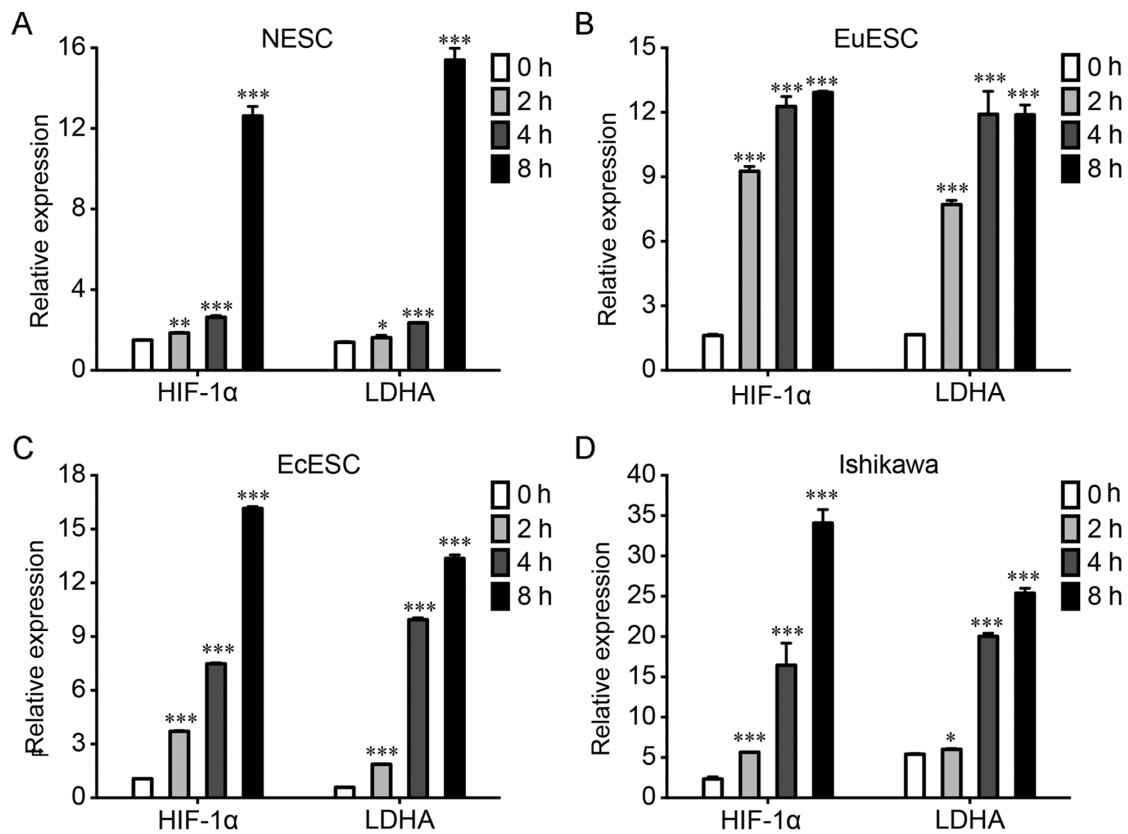

Figure S3. Effect of LDHA-knockdown on cell cycle distribution of Ishikawa cells and THESC cells. Representative graphs of cell cycle distribution as evaluated by flow cytometry in (A) Ishikawa cells and (B) THESC cells treated with sh-LDHA or sh-Con. Percentage-based histograms showing the cell cycle distribution of (C) Ishikawa cells and (D) THESC cells in the sh-LDHA treatment group compared with control (sh-Con). Western blot analysis of cell cycle-related proteins in (E) Ishikawa cells and (F) THESC cells when treated with sh-LDHA or the control (sh-Con). Values are expressed as mean  $\pm$  SD of three independent experiments. One-way ANOVA and Bonferroni post hoc test were used to analyze multiple comparisons. \* $P < 0.05$ , vs. sh-Con,  $G_1$ -phase and S-phase Ishikawa cells. LDHA, lactate dehydrogenase A; sh-, short hairpin; Con, control.

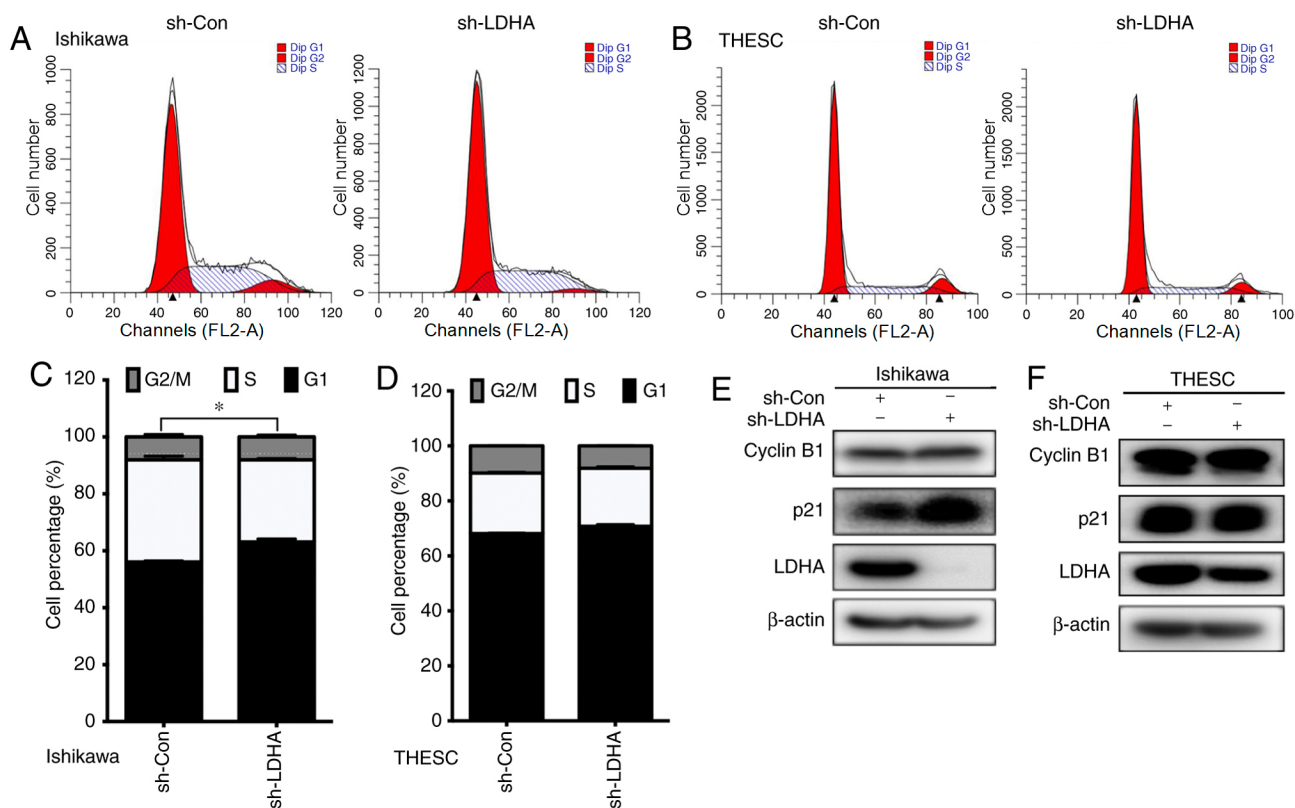

Figure S4. Effects of LDHA-knockdown on migration and proliferation of Ishikawa cells and THESC cells. Effect of LDHA-knockdown on (A) Ishikawa cell and (B) THESC migration was evaluated using a Transwell assay. Migrated cells were stained by crystal violet (magnification, x100). (C) Cells were counted using microscopy and histograms summarizing this data show the effect of sh-LDHA on Ishikawa cells (left panel) and THESC cells (right panel) compared with the control group (sh-Con). (D) Western blot analysis of E-cadherin, vimentin,  $\beta$ -catenin and LDHA expression in Ishikawa cells and THESC cells. (E and F) Cell Counting Kit-8 assay was used to examine cell proliferation. Values are expressed as mean  $\pm$  SD of three independent experiments. Student's t-test was used to compare two groups. \*\* $P < 0.01$  and \*\*\* $P < 0.001$  vs. sh-Con. LDHA, lactate dehydrogenase A; sh-, short hairpin; Con, control.

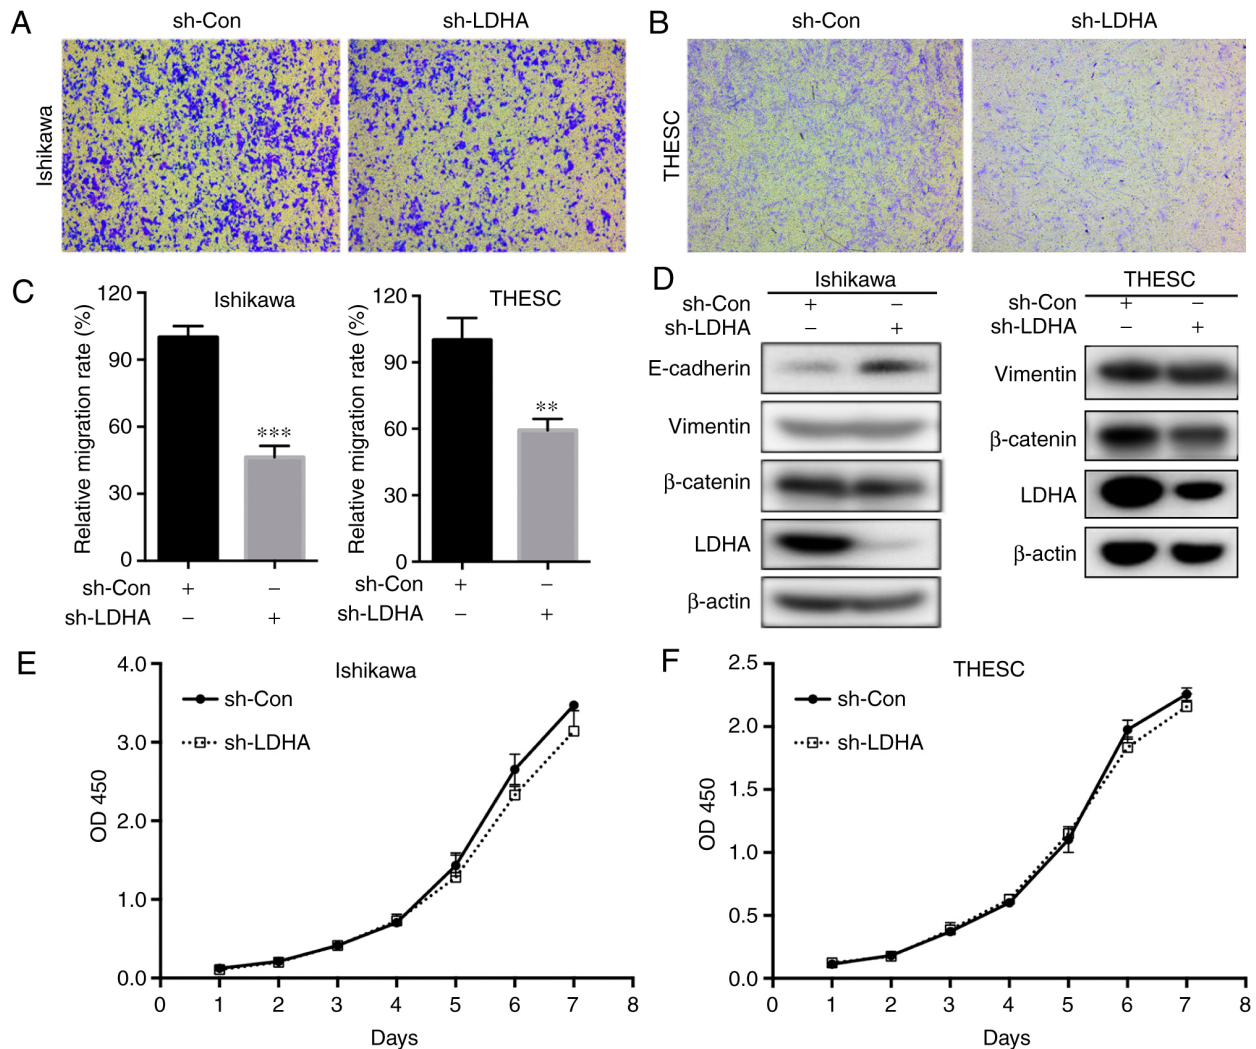

Table SI. Antibodies used in western blotting.

| Protein name      | Company                         | Catalogue number |
|-------------------|---------------------------------|------------------|
| $\beta$ -actin    | ProteinTech Group, Inc.         | 66009-1-Ig       |
| LDHA              | Cell Signaling Technology, Inc. | 3582S            |
| HIF-1 $\alpha$    | Abcam                           | ab51608          |
| Cyclin B1         | Cell Signaling Technology, Inc. | 12231S           |
| Cleaved-caspase 3 | Cell Signaling Technology, Inc. | 9664S            |
| Caspase 3         | Cell Signaling Technology, Inc. | 9662S            |
| PDK1              | Cell Signaling Technology, Inc. | 3062S            |
| p21               | Cell Signaling Technology, Inc. | 2947S            |
| E-cadherin        | Cell Signaling Technology, Inc. | 3195S            |
| Vimentin          | Cell Signaling Technology, Inc. | 5741S            |
| $\beta$ -catenin  | Cell Signaling Technology, Inc. | 8480S            |
| BCL-2 family kit  | Cell Signaling Technology, Inc. | 9942T            |
| Pan-cytokeratin   | Abcam                           | ab215838         |

LDHA, lactate dehydrogenase A; HIF-1 $\alpha$ , hypoxia inducible factor 1 $\alpha$ ; PDK, pyruvate dehydrogenase kinase 1.

Table SII. Primers used for reverse transcription-quantitative PCR.

| Gene name (species)                                                                                            | Primer sequences, 5'-3' |
|----------------------------------------------------------------------------------------------------------------|-------------------------|
| <i>LDHA</i> (human)                                                                                            |                         |
| Forward                                                                                                        | GGTTGGTGCTGTTGGCATGG    |
| Reverse                                                                                                        | TGCCCCAGCCGTGATAATGA    |
| <i>HIF-1<math>\alpha</math></i> (human)                                                                        |                         |
| Forward                                                                                                        | TGAGCCTAATAGTCCCAGTGAA  |
| Reverse                                                                                                        | TAGGGAGCTAACATCTCCAAGT  |
| <i>18S</i> (human)                                                                                             |                         |
| Forward                                                                                                        | CTCTTAGCTGAGTGTCCCGC    |
| Reverse                                                                                                        | CTGATCGTCTTCGAACCTCC    |
| <i>LDHA</i> , lactate dehydrogenase A; <i>HIF-1<math>\alpha</math></i> , hypoxia inducible factor 1 $\alpha$ . |                         |

Table SIII. Differences in the expression levels of lactate dehydrogenase A (based on H-Score) in paired eutopic and ectopic tissues obtained from 25 patients with endometriosis.

| Cell type       | Eutopic endometrium | Ectopic endometrium | P-value <sup>a</sup> |
|-----------------|---------------------|---------------------|----------------------|
| Glandular cells | 0.5 (0-1.75)        | 1.0 (0.5-3.0)       | 0.007                |
| Stromal cells   | 0.5 (0-0.5)         | 1.0 (0.5-2.5)       | <0.001               |

<sup>a</sup>Wilcoxon signed-rank test. Data are presented as the median (25th-75th percentile).
